# Supplementary material for: Accelerated fission rate irradiation design, pre-irradiation characterization, and adaptation of conventional PIE methods for U-10Mo and U-17Mo
Source: Frontiers journal article supplement (doi:10.3389/fnuen.2022.1054288), 2023-01-09
Supplement: Table_1.DOCX [file Table_1.DOCX]

Supplementary Material

# Monte Carlo Error Propagation Code

import numpy as np

mean = # array of calculated values

sdev = # array of uncertainties in the mean values

length = len(mean)

num = int(1e5) # number of histories in simulation

ave = 0

std = 0

for i in range(num):

for j in range(length):

temp = np.random.normal(mean[j],sdev[j])

std += temp*temp

ave += temp

num = num*length

ave /= num

std = np.sqrt((num/(num-1))*(std/num-ave*ave))

# Supplemental Figures and Table

Data from the following figures and table are discussed within the next of the associated manuscript. Briefly, Figure S.1 presents as-irradiated fission rates as a function of irradiation time for the first, lowest dose experiment. At day 26, the reactor cycle ended and the irradiation began again when the new cycle was started. Figure S.2 shows a schematic of the MiniFuel puncture unit. Calibration data for the nanoindentation system using a fused SiO2 standard is shown in Figure S.3. Both hardness, Figure S.3(A) and modulus, Figure S.3(B), stabilize to bulk values by 200 nm depth. Figure S.4 shows low magnification SE images of two representative U-Mo samples, revealing larger, interconnected pores at low magnification. Higher magnification, Figure S.5, shows the both the dendritic bands mentioned in the main text of the paper, as well as several local defects consisting both of clear pores, as well as smaller precipitate-type defects. Grain structure obtained by EBSD is shown by an inverse pole figure (IPF) map of all four pre-irradiation specimens in Figure S.6. Finally, Table S.1 contains the raw geometry data for all identified pores and precipitates in the Slice-and-View operation.

Figure S.: Fission rate as a function of time for the low burnup (nominal fission density of 3 × 1020 cm-3) sample set.


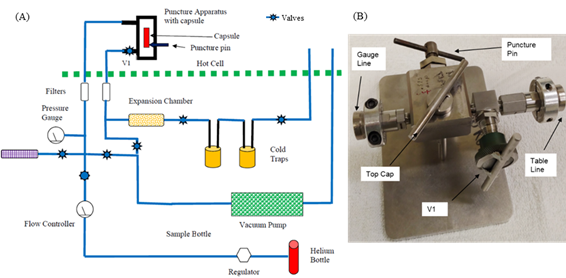


Figure S.: (A) Schematic of the puncture system; the top portion above the dotted green line is located inside the hot cell, and all other elements are outside the hot cell. (B) Photograph of the in-cell puncture unit.

Figure S.: The (a) hardness and (b) modulus of the SiO2 standard following calibration as a function of indentation depth.


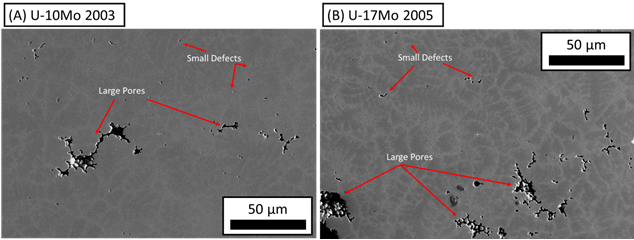


**Figure S.4: SE images of (A) U-10Mo 2003 and (B) U-17Mo 2005 showing larger, sometimes interconnected voids, such as (A). These regions tended to be located towards the sample center and were the largest contributors to bulk porosity. In both sections, large pores and smaller defects are indicated by arrows and annotations.**

**
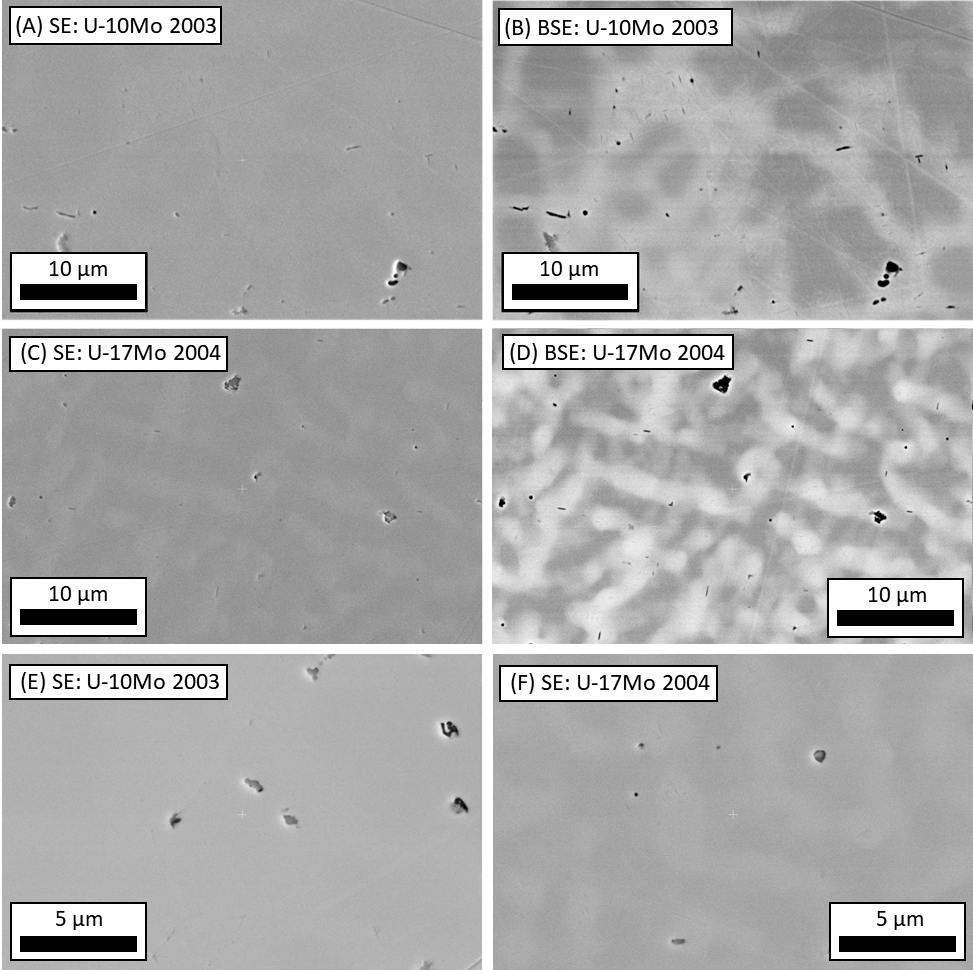
**

**Figure S.5: Higher magnification SEM micrographs of U-10Mo 2003 (A, B, and E) and U-17Mo 2004 (C, D, and F). Secondary electron (SE) images (A, C, E, and F) show precipitate and void defects. Backscatter (BSE) images (B and D) show elemental contrast of the dendritic bands indicative of Mo concentration variations.**

**
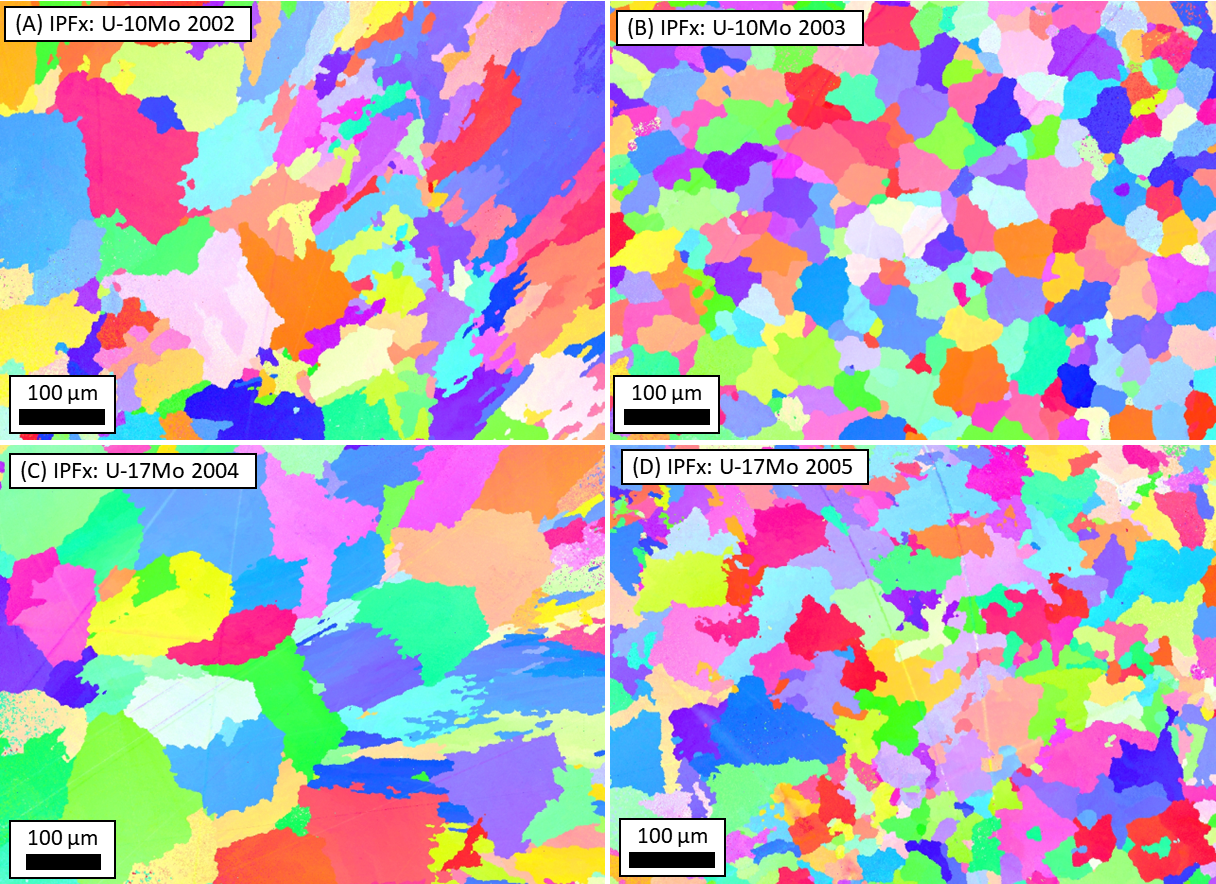
**

Figure S.: Representative raw IPFx maps generated for each of the 4 alloys in this study. Maps U-10Mo 2002 (A), U-10Mo 2003 (B), U-17Mo 2004 (C), and U-17Mo 2005 (D) were each generated with 1µm

Table S.: Defect geometry analysis for all defects identified in the Slice-and-View operation

| | Defect # | Pore Volume | Pore Sphericity | Pore Aspect Ratio | Precipitate Volume | Precipitate Sphericity | Precipitate Aspect Ratio | | --- | --- | --- | --- | --- | --- | --- | | Average | 1.45E-02 | 7.78E-03 | 4.49E-02 | 7.01E-04 | 6.08E-03 | 4.86E-02 | | Standard Deviation | 1.31E-01 | 1.57E-02 | 1.39E-01 | 1.34E-03 | 4.31E-03 | 5.39E-02 | | Skewness | 4.97E+00 | -3.31E-01 | 1.24E+00 | 2.37E+00 | 1.13E+00 | 2.24E+00 | | Kurtosis | 2.48E+01 | -1.51E+00 | -2.96E-02 | 5.81E+00 | 1.89E+00 | 6.99E+00 | | 1 | 8.00E-02 | 2.04E-02 | 3.14E-02 | - | - | - | | 2 | - | - | - | 3.18E-03 | 1.42E-02 | 1.32E-02 | | 3 | - | - | - | 1.10E-04 | 3.63E-03 | 3.13E-01 | | 4 | - | - | - | 4.40E-03 | 1.41E-02 | 1.23E-02 | | 5 | - | - | - | 2.45E-05 | 1.37E-02 | 2.31E-02 | | 6 | - | - | - | 5.41E-06 | 1.42E-02 | 6.49E-03 | | 7 | - | - | - | 1.27E-03 | 9.59E-03 | 6.78E-02 | | 8 | - | - | - | 6.04E-03 | 6.54E-03 | 9.73E-02 | | 9 | - | - | - | 2.51E-05 | 1.14E-02 | 2.32E-02 | | 10 | - | - | - | 1.11E-05 | 5.44E-03 | 7.68E-02 | | 11 | 3.97E-06 | 4.58E-02 | 4.23E-02 | - | - | - | | 12 | - | - | - | 8.30E-04 | 7.12E-03 | 1.69E-01 | | 13 | - | - | - | 6.86E-06 | 1.16E-02 | 2.94E-02 | | 14 | - | - | - | 1.33E-04 | 5.87E-03 | 6.94E-02 | | 15 | - | - | - | 1.23E-04 | 1.05E-02 | 1.24E-02 | | 16 | - | - | - | 7.57E-04 | 5.92E-03 | 2.16E-02 | | 17 | - | - | - | 1.35E-03 | 7.37E-03 | 8.06E-02 | | 18 | - | - | - | 1.26E-05 | 7.54E-03 | 4.17E-02 | | 19 | - | - | - | 6.01E-06 | 9.42E-03 | 3.15E-02 | | 20 | - | - | - | 1.60E-06 | 7.44E-03 | 1.02E-01 | | 21 | - | - | - | 8.93E-04 | 8.63E-03 | 8.55E-02 | | 22 | - | - | - | 1.95E-04 | 7.72E-03 | 1.15E-01 | | 23 | - | - | - | 9.54E-05 | 6.83E-03 | 1.09E-01 | | 24 | 2.56E-06 | 4.82E-02 | 2.89E-02 | - | - | - | | 25 | - | - | - | 4.31E-04 | 6.72E-03 | 7.08E-02 | | 26 | - | - | - | 2.42E-05 | 1.10E-02 | 4.18E-02 | | 27 | 1.96E-06 | 5.13E-02 | 2.56E-02 | - | - | - | | 28 | 6.75E-04 | 2.71E-02 | 1.92E-01 | - | - | - | | 29 | 3.51E-03 | 1.30E-02 | 2.63E-01 | - | - | - | | 30 | 1.66E-03 | 2.00E-02 | 3.93E-01 | - | - | - | | 31 | - | - | - | 2.32E-03 | 6.69E-03 | 1.13E-01 | | 32 | 9.01E-03 | 1.27E-02 | 6.18E-01 | - | - | - | | 33 | - | - | - | 3.89E-03 | 5.83E-03 | 4.47E-02 | | 34 | - | - | - | 2.03E-06 | 7.98E-03 | 3.96E-02 | | 35 | - | - | - | 2.85E-04 | 5.35E-03 | 9.05E-02 | | 36 | - | - | - | 4.82E-04 | 8.66E-03 | 5.39E-02 | | 37 | - | - | - | 4.33E-04 | 5.73E-03 | 1.10E-01 | | 38 | - | - | - | 8.45E-05 | 7.79E-03 | 5.61E-02 | | 39 | - | - | - | 1.67E-06 | 7.98E-03 | 2.31E-02 | | 40 | - | - | - | 1.60E-04 | 6.51E-03 | 9.52E-02 | | 41 | - | - | - | 2.73E-04 | 4.92E-03 | 3.41E-02 | | 42 | - | - | - | 1.05E-03 | 4.68E-03 | 1.18E-01 | | 43 | 2.65E-06 | 4.55E-02 | 3.32E-02 | - | - | - | | 44 | 6.52E-06 | 4.74E-02 | 3.40E-02 | - | - | - | | 45 | - | - | - | 7.43E-04 | 8.17E-03 | 7.53E-02 | | 46 | - | - | - | 7.47E-05 | 1.03E-02 | 5.21E-02 | | 47 | - | - | - | 4.66E-06 | 1.00E-02 | 5.05E-02 | | 48 | - | - | - | 7.29E-03 | 5.37E-03 | 5.46E-02 | | 49 | 5.82E-06 | 4.30E-02 | 2.71E-02 | - | - | - | | 50 | - | - | - | 4.34E-03 | 6.02E-03 | 7.60E-02 | | 51 | - | - | - | 7.72E-05 | 7.30E-03 | 8.63E-02 | | 52 | 4.36E-03 | 1.61E-02 | 4.60E-01 | - | - | - | | 53 | 1.90E-03 | 1.79E-02 | 2.21E-01 | - | - | - | | 54 | - | - | - | 2.76E-03 | 8.42E-03 | 6.05E-02 | | 55 | - | - | - | 5.93E-04 | 5.56E-03 | 1.70E-01 | | 56 | 5.55E-06 | 4.94E-02 | 2.70E-02 | - | - | - | | 57 | - | - | - | 1.09E-03 | 8.78E-03 | 6.37E-02 | | 58 | 2.38E-06 | 3.04E-02 | 7.47E-02 | - | - | - | | 59 | 2.42E-02 | 1.98E-03 | 6.95E-01 | - | - | - | | 60 | - | - | - | 3.16E-04 | 9.06E-03 | 6.31E-02 | | 61 | - | - | - | 1.97E-03 | 7.41E-03 | 8.32E-02 | | 62 | - | - | - | 5.13E-06 | 4.77E-03 | 6.50E-02 | | 63 | 1.75E-06 | 4.41E-02 | 2.91E-02 | - | - | - | | 64 | - | - | - | 6.78E-04 | 5.69E-03 | 2.44E-01 | | 65 | - | - | - | 2.18E-05 | 7.83E-03 | 2.94E-02 | | 66 | - | - | - | 1.07E-03 | 6.08E-03 | 6.43E-02 | | 67 | 3.85E-02 | 1.26E-02 | 5.99E-01 | - | - | - | | 68 | 1.59E-03 | 1.73E-02 | 6.42E-01 | - | - | - | | 69 | - | - | - | 8.80E-04 | 7.90E-03 | 5.74E-02 | | 70 | - | - | - | 1.07E-03 | 1.07E-02 | 3.30E-02 | | 71 | 9.50E-07 | 4.82E-02 | 2.24E-02 | - | - | - | | 72 | - | - | - | 1.78E-04 | 9.27E-03 | 6.10E-02 | | 73 | - | - | - | 7.82E-06 | 1.84E-02 | 7.83E-03 | | 74 | - | - | - | 3.30E-03 | 3.80E-03 | 2.08E-02 | | 75 | - | - | - | 4.78E-06 | 6.89E-03 | 7.82E-02 | | 76 | 1.33E+00 | 1.70E-02 | 2.81E-02 | - | - | - | | 77 | - | - | - | 2.09E-03 | 5.85E-03 | 2.06E-01 | | 78 | - | - | - | 8.01E-06 | 1.18E-02 | 2.27E-02 | | 79 | 6.38E-06 | 4.60E-02 | 2.93E-02 | - | - | - | | 80 | - | - | - | 5.18E-04 | 8.39E-03 | 1.39E-02 | | 81 | - | - | - | 4.26E-04 | 7.42E-03 | 4.78E-02 | | 82 | - | - | - | 1.12E-04 | 8.00E-03 | 5.51E-02 | | 83 | - | - | - | 9.26E-06 | 1.05E-02 | 3.46E-02 | | 84 | - | - | - | 1.01E-04 | 8.06E-03 | 1.85E-02 | | 85 | 3.96E-05 | 4.34E-02 | 3.50E-02 | - | - | - | | 86 | - | - | - | 1.39E-04 | 1.02E-02 | 5.05E-02 | | 87 | - | - | - | 8.20E-04 | 5.14E-03 | 7.49E-02 | | 88 | - | - | - | 2.10E-04 | 5.79E-03 | 5.45E-02 | | 89 | - | - | - | 7.23E-04 | 7.12E-03 | 1.53E-02 | | 90 | - | - | - | 1.62E-03 | 8.58E-03 | 1.69E-02 | | 91 | - | - | - | 5.88E-06 | 7.73E-03 | 3.12E-02 | | 92 | - | - | - | 6.40E-06 | 1.58E-02 | 8.73E-03 | | 93 | - | - | - | 4.70E-03 | 6.29E-03 | 1.85E-02 | | 94 | 2.71E-05 | 4.20E-02 | 3.82E-02 | - | - | - | | 96 | - | - | - | 1.54E-04 | 1.01E-02 | 3.55E-02 | | 97 | - | - | - | 1.75E-03 | 5.61E-03 | 8.42E-02 | | 98 | 2.45E-05 | 4.02E-02 | 2.87E-02 | - | - | - | | 99 | - | - | - | 1.18E-04 | 2.91E-03 | 3.84E-02 | | 100 | - | - | - | 3.46E-04 | 6.49E-03 | 1.39E-01 | | 101 | - | - | - | 2.05E-03 | 9.97E-03 | 3.68E-02 | | 102 | - | - | - | 2.66E-04 | 9.64E-03 | 4.57E-02 | | 103 | - | - | - | 6.21E-04 | 9.07E-03 | 7.42E-02 | |
| --- | --- | --- | --- | --- | --- | --- | --- | --- | --- | --- | --- | --- | --- | --- | --- | --- | --- | --- | --- | --- | --- | --- | --- | --- | --- | --- | --- | --- | --- | --- | --- | --- | --- | --- | --- | --- | --- | --- | --- | --- | --- | --- | --- | --- | --- | --- | --- | --- | --- | --- | --- | --- | --- | --- | --- | --- | --- | --- | --- | --- | --- | --- | --- | --- | --- | --- | --- | --- | --- | --- | --- | --- | --- | --- | --- | --- | --- | --- | --- | --- | --- | --- | --- | --- | --- | --- | --- | --- | --- | --- | --- | --- | --- | --- | --- | --- | --- | --- | --- | --- | --- | --- | --- | --- | --- | --- | --- | --- | --- | --- | --- | --- | --- | --- | --- | --- | --- | --- | --- | --- | --- | --- | --- | --- | --- | --- | --- | --- | --- | --- | --- | --- | --- | --- | --- | --- | --- | --- | --- | --- | --- | --- | --- | --- | --- | --- | --- | --- | --- | --- | --- | --- | --- | --- | --- | --- | --- | --- | --- | --- | --- | --- | --- | --- | --- | --- | --- | --- | --- | --- | --- | --- | --- | --- | --- | --- | --- | --- | --- | --- | --- | --- | --- | --- | --- | --- | --- | --- | --- | --- | --- | --- | --- | --- | --- | --- | --- | --- | --- | --- | --- | --- | --- | --- | --- | --- | --- | --- | --- | --- | --- | --- | --- | --- | --- | --- | --- | --- | --- | --- | --- | --- | --- | --- | --- | --- | --- | --- | --- | --- | --- | --- | --- | --- | --- | --- | --- | --- | --- | --- | --- | --- | --- | --- | --- | --- | --- | --- | --- | --- | --- | --- | --- | --- | --- | --- | --- | --- | --- | --- | --- | --- | --- | --- | --- | --- | --- | --- | --- | --- | --- | --- | --- | --- | --- | --- | --- | --- | --- | --- | --- | --- | --- | --- | --- | --- | --- | --- | --- | --- | --- | --- | --- | --- | --- | --- | --- | --- | --- | --- | --- | --- | --- | --- | --- | --- | --- | --- | --- | --- | --- | --- | --- | --- | --- | --- | --- | --- | --- | --- | --- | --- | --- | --- | --- | --- | --- | --- | --- | --- | --- | --- | --- | --- | --- | --- | --- | --- | --- | --- | --- | --- | --- | --- | --- | --- | --- | --- | --- | --- | --- | --- | --- | --- | --- | --- | --- | --- | --- | --- | --- | --- | --- | --- | --- | --- | --- | --- | --- | --- | --- | --- | --- | --- | --- | --- | --- | --- | --- | --- | --- | --- | --- | --- | --- | --- | --- | --- | --- | --- | --- | --- | --- | --- | --- | --- | --- | --- | --- | --- | --- | --- | --- | --- | --- | --- | --- | --- | --- | --- | --- | --- | --- | --- | --- | --- | --- | --- | --- | --- | --- | --- | --- | --- | --- | --- | --- | --- | --- | --- | --- | --- | --- | --- | --- | --- | --- | --- | --- | --- | --- | --- | --- | --- | --- | --- | --- | --- | --- | --- | --- | --- | --- | --- | --- | --- | --- | --- | --- | --- | --- | --- | --- | --- | --- | --- | --- | --- | --- | --- | --- | --- | --- | --- | --- | --- | --- | --- | --- | --- | --- | --- | --- | --- | --- | --- | --- | --- | --- | --- | --- | --- | --- | --- | --- | --- | --- | --- | --- | --- | --- | --- | --- | --- | --- | --- | --- | --- | --- | --- | --- | --- | --- | --- | --- | --- | --- | --- | --- | --- | --- | --- | --- | --- | --- | --- | --- | --- | --- | --- | --- | --- | --- | --- | --- | --- | --- | --- | --- | --- | --- | --- | --- | --- | --- | --- | --- | --- | --- | --- | --- | --- | --- | --- | --- | --- | --- | --- | --- | --- | --- | --- | --- | --- | --- | --- | --- | --- | --- | --- | --- | --- | --- | --- | --- | --- | --- | --- | --- | --- | --- | --- | --- | --- | --- | --- | --- | --- | --- | --- | --- | --- | --- | --- | --- | --- | --- | --- | --- | --- | --- | --- | --- | --- | --- | --- | --- | --- | --- | --- | --- | --- | --- | --- | --- | --- | --- | --- | --- | --- | --- | --- | --- | --- | --- | --- | --- | --- | --- | --- | --- | --- | --- | --- | --- | --- | --- | --- | --- | --- | --- | --- | --- | --- | --- | --- | --- | --- | --- | --- | --- | --- | --- | --- | --- | --- | --- | --- | --- | --- | --- | --- | --- | --- | --- | --- | --- | --- | --- | --- | --- | --- | --- | --- | --- | --- | --- | --- | --- | --- | --- | --- | --- | --- | --- | --- | --- | --- | --- | --- | --- | --- | --- | --- | --- | --- | --- | --- | --- | --- | --- | --- | --- | --- | --- | --- | --- | --- | --- | --- | --- | --- | --- | --- | --- | --- | --- | --- | --- | --- | --- | --- | --- | --- | --- | --- | --- | --- | --- | --- | --- | --- | --- | --- | --- | --- | --- | --- | --- | --- | --- | --- | --- | --- | --- | --- | --- | --- | --- |
